# Supplementary material for: Kinetic and Isotherm Studies of Organic and Inorganic Anions Adsorption from Water by Quaternized Pentablock Copolymeric Film (PTBr)
Source: MDPI journal article supplement (doi:10.3390/polym17121624), 2025-06-11
Supplement: s1 [file polymers-3662274-supplementary.pdf › polymers-3662274-supplementary.pdf]

# Kinetic and isotherm studies of organic and inorganic anions adsorption from water by quaternized pentablock copolymeric film (PTBr)

Simona Crispi<sup>1</sup>, Simona Filice<sup>1\*</sup>, Viviana Scuderi<sup>1</sup>, Massimo Zimbone<sup>2</sup>, Daniela Iannazzo<sup>3</sup>, Consuelo Celesti<sup>3</sup> and Silvia Scalese<sup>1</sup>

<sup>1</sup>Consiglio Nazionale delle Ricerche, Istituto per la Microelettronica e Microsistemi (CNR-IMM), Ottava Strada n.5, 95121 Catania, Italy: simona.crispi@cnr.it, viviana.scuderi@imm.cnr.it, silvia.scalese@imm.cnr.it;

<sup>2</sup>Consiglio Nazionale delle Ricerche, Istituto per la Microelettronica e Microsistemi (CNR-IMM), Via S. Sofia 64, 95123 Catania, Italy: massimo.zimbone@cnr.it;

<sup>3</sup>Department of Engineering, University of Messina, Contrada Di Dio, I-98166 Messina, Italy: daniela.iannazzo@unime.it; consuelo.celesti@unime.it;

\*Correspondence: simona.filice@cnr.it.

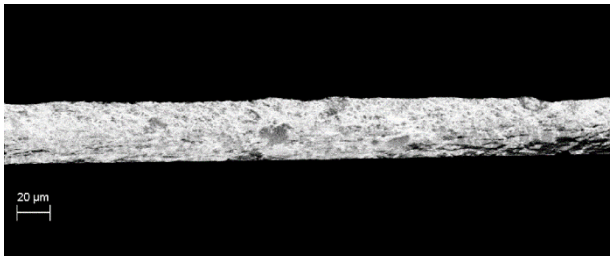

Figure S1. SEM image of PTBr film cross section.

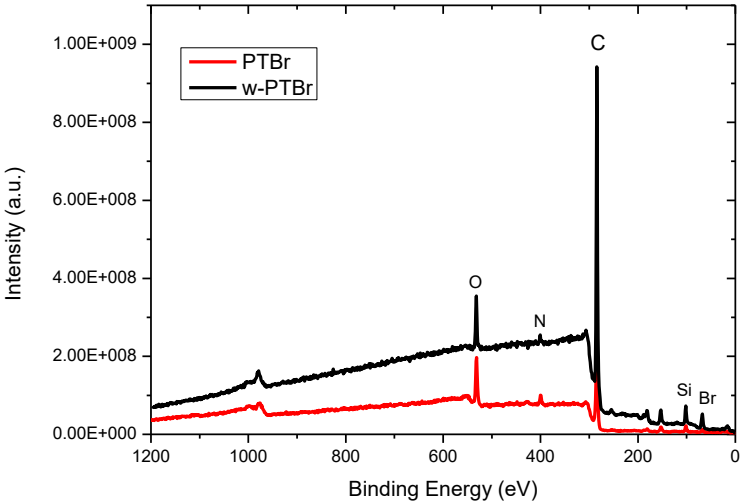

Figure S2. Survey spectra of PTBr film before and after the washing treatment.

Table S1. The peak area ratios of N1s, O1s and Br3d with respect to C1s calculated from XPS spectra before and after the washing treatment.

| Element ratio | PTBr  | w-PTBr |
|---------------|-------|--------|
| N/C           | 0.146 | 0.094  |
| O/C           | 0.759 | 0.455  |
| Br/C          | 0.205 | 0.0195 |

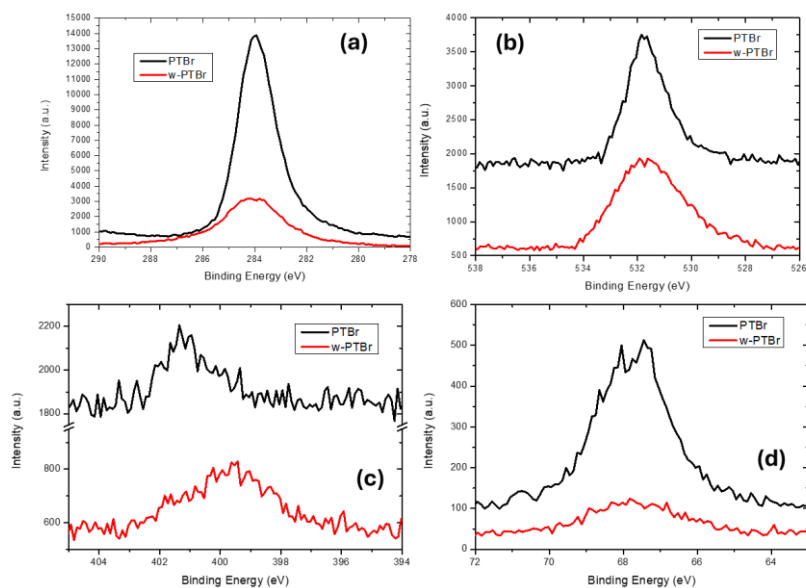

**Figure S3.** C1s (a), O1s (b), N1s (c) and Br3d (d) XPS spectra acquired on PTBr film before and after the washing treatment.

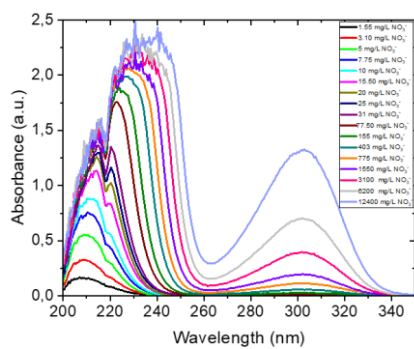

**Figure S4.** UV-Visible spectrum of  $\text{NO}_3^-$  solutions within a range of concentrations between 1.55 - 12400 mg/L.

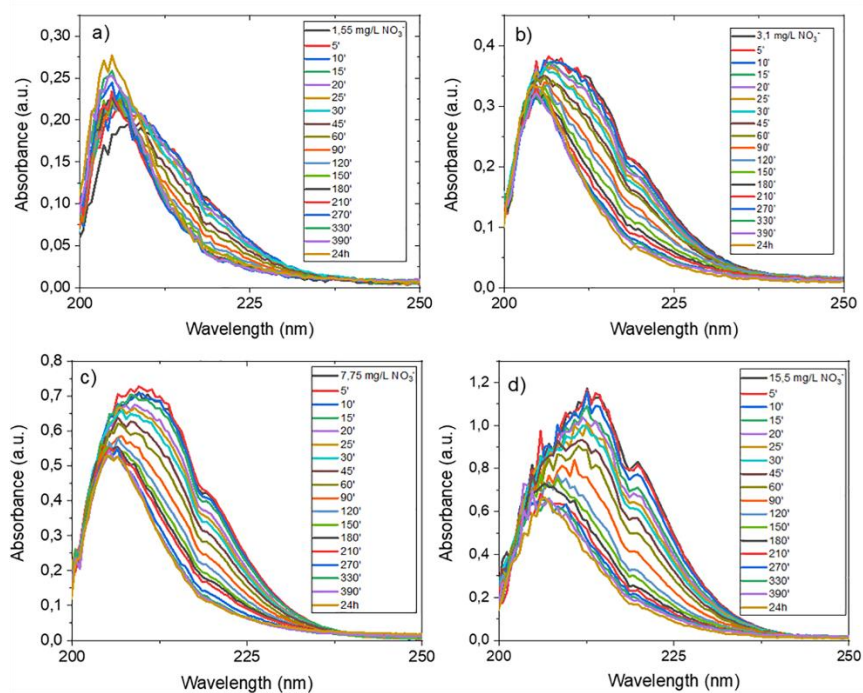

**Figure S5.** UV-Vis absorbance spectra over adsorption time for different initial  $\text{NO}_3^-$  concentrated solutions in the presence of a w-PTBr membrane: (a) 1.55 mg/L; (b) 3.10 mg/L; (c) 7.75 mg/L and (d) 15.50 mg/L.

**Table S2.** Fitting parameters of PFO, PSO and diffusion kinetic models for nitrate adsorption at 1.55, 3.10, 7.75 and 15.50 mg/L initial concentrations up to 330 minutes.

| Nitrate initial concentration (mg/L) | Kinetic model | R <sup>2</sup> | SLOPE                | INTERCEPT             |
|--------------------------------------|---------------|----------------|----------------------|-----------------------|
| 1.55                                 | PFO           | 0.995          | $-0.0136 \pm 0.0002$ | $0.1870 \pm 0.0351$   |
|                                      | PSO           | 0.014          | $0.9915 \pm 0.8977$  | $2.1257 \pm 125.2019$ |
|                                      | DIFF          | 0.940          | $0.0770 \pm 0.0050$  | $-0.0967 \pm 0.0495$  |
| 3.10                                 | PFO           | 0.992          | $-0.0079 \pm 0.0002$ | $0.9018 \pm 0.0251$   |
|                                      | PSO           | 0.065          | $0.1983 \pm 0.1388$  | $62.3801 \pm 19.3546$ |
|                                      | DIFF          | 0.983          | $0.1481 \pm 0.0050$  | $-0.1767 \pm 0.0495$  |
| 7.75                                 | PFO           | 0.971          | $-0.0104 \pm 0.0005$ | $1.8776 \pm 0.0648$   |
|                                      | PSO           | 0.394          | $0.1327 \pm 0.0404$  | $13.0249 \pm 5.6389$  |
|                                      | DIFF          | 0.968          | $0.3884 \pm 0.0181$  | $-0.5354 \pm 0.1789$  |
| 15.50                                | PFO           | 0.991          | $-0.0100 \pm 0.0002$ | $2.2561 \pm 0.0336$   |
|                                      | PSO           | 0.015          | $0.0433 \pm 0.0390$  | $14.3544 \pm 5.4415$  |
|                                      | DIFF          | 0.955          | $0.6412 \pm 0.0358$  | $-0.4278 \pm 0.3536$  |

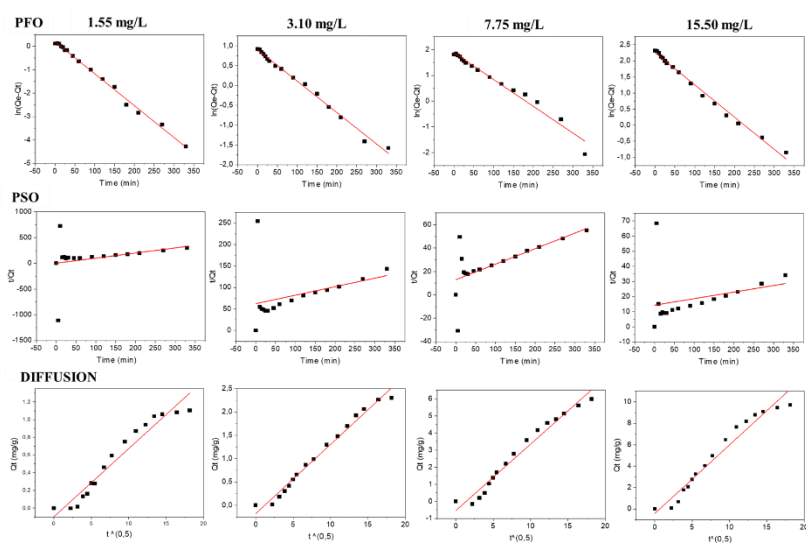

**Figure S6.** Linear fitting of PFO, PSO and diffusion kinetic models for nitrate adsorption at 1.55, 3.10, 7.75 and 15.50 mg/L initial concentrations up to 330 minutes.

**Table S3.** Fitting parameters of PFO, PSO and diffusion kinetic models for nitrate adsorption at 1.55, 3.10, 7.75 and 15.50 mg/L initial concentration in three different time regions i.e. 10-60 minutes, 60-180 minutes and up to 330 minutes.

| Nitrate concentrations (mg/L) | Kinetic Models | Process Time   |                     |                        |                |                     |                     |                |                     |                     |
|-------------------------------|----------------|----------------|---------------------|------------------------|----------------|---------------------|---------------------|----------------|---------------------|---------------------|
|                               |                | 10-60 min      |                     |                        | 60-180 min     |                     |                     | 180-330 min    |                     |                     |
|                               |                | R <sup>2</sup> | SLOPE               | INTERCEPT              | R <sup>2</sup> | SLOPE               | INTERCEPT           | R <sup>2</sup> | SLOPE               | INTERCEPT           |
| 1.55                          | PFO            | 0.989          | -0.0145<br>± 0.0007 | 0.2272 ±<br>0.0219     | 0.960          | -0.0148<br>± 0.0015 | 0.3204 ±<br>0.1905  | 0.971          | -0.0114<br>± 0.0011 | -0.4085 ±<br>0.2892 |
|                               | PSO            | 0.1011         | -6.6125<br>± 5.1097 | 387.4733 ±<br>171.3840 | 0.997          | 0.6150 ±<br>0.0182  | 64.4688 ±<br>2.3208 | 0.999          | 0.8373 ±<br>0.0050  | 22.8381 ±<br>1.273  |
|                               | DIFF           | 0.986          | 0.1237 ±<br>0.0061  | -0.3701 ±<br>0.0330    | 0.991          | 0.0767 ±<br>0.0037  | 0.0126 ±<br>0.0399  | 0.972          | 0.0138 ±<br>0.0013  | 0.8549 ±<br>0.0210  |
|                               |                |                |                     |                        |                |                     |                     |                |                     |                     |
| 3.10                          | PFO            | 0.970          | -0.0087<br>± 0.0006 | 0.9064 ±<br>0.0208     | 0.979          | -0.0077<br>± 0.0006 | 0.9083 ±<br>0.0717  | 0.915          | -0.0072<br>± 0.0013 | 0.6932 ±<br>0.3175  |

|       |      |        |                     |                     |       |                     |                     |       |                       |                     |
|-------|------|--------|---------------------|---------------------|-------|---------------------|---------------------|-------|-----------------------|---------------------|
|       | PSO  | 0.148  | 0.1668 ±<br>0.1168  | 46.0193 ±<br>3.9176 | 0.974 | 0.2805 ±<br>0.0227  | 44.9729 ±<br>2.8935 | 0.988 | 0.3303 ±<br>0.0208    | 32.7753 ±<br>5.2814 |
|       | DIFF | 0.987  | 0.1823 ±<br>0.0085  | -0.3830 ±<br>0.0461 | 0.994 | 0.1615±<br>0.0062   | -0.2619 ±<br>0.0681 | 0.892 | 0.0808 ±<br>0.0159    | 0.8754 ±<br>0.2508  |
|       |      |        |                     |                     |       |                     |                     |       |                       |                     |
| 7.75  | PFO  | 0.978  | -0.0114<br>± 0.007  | 1.8640 ±<br>0.0230  | 0.989 | -0.0079<br>± 0.0004 | 1.6526 ±<br>0.0531  | 0.944 | -0.0153<br>± 0.0021   | 3.1345 ±<br>0.5413  |
|       | PSO  | 0.144  | -0.3479<br>± 0.2454 | 35.5441 ±<br>8.2294 | 0.996 | 0.1307 ±<br>0.0042  | 13.5008 ±<br>0.5358 | 0.999 | 0.0108                | 0.1191 ±<br>0.0006  |
|       | DIFF | 0.986  | 0.5688 ±<br>0.0281  | -1.5667 ±<br>0.1519 | 0.976 | 0.3635 ±<br>0.0285  | 0.0624 ±<br>0.3123  | 0.992 | 0.2436 ±<br>0.0124    | 1.5736 ±<br>0.1944  |
|       |      |        |                     |                     |       |                     |                     |       |                       |                     |
| 15.50 | PFO  | 0.973  | -0.0115<br>± 0.0008 | 2.3142 ±<br>0.0262  | 0.995 | -0.0110<br>± 0.0004 | 2.2897 ±<br>0.0509  | 0.999 | -0.0077<br>± 0.0009   | 1.6773 ±<br>0.0237  |
|       | PSO  | -0.198 | 0.0041 ±<br>0.0596  | 10.5685 ±<br>2.0001 | 0.993 | 0.0708 ±<br>0.0030  | 7.5841 ±<br>0.3862  | 0.999 | 0.0899<br>±<br>0.0003 | 4.2497 ±<br>0.0748  |
|       | DIFF | 0.979  | 0.9037 ±<br>0.0531  | -1.9129 ±<br>0.2871 | 0.971 | 0.6702 ±<br>0.0574  | -0.0014 ±<br>0.6286 | 0.979 | 0.1932 ±<br>0.0163    | 6.2475 ±<br>0.2561  |

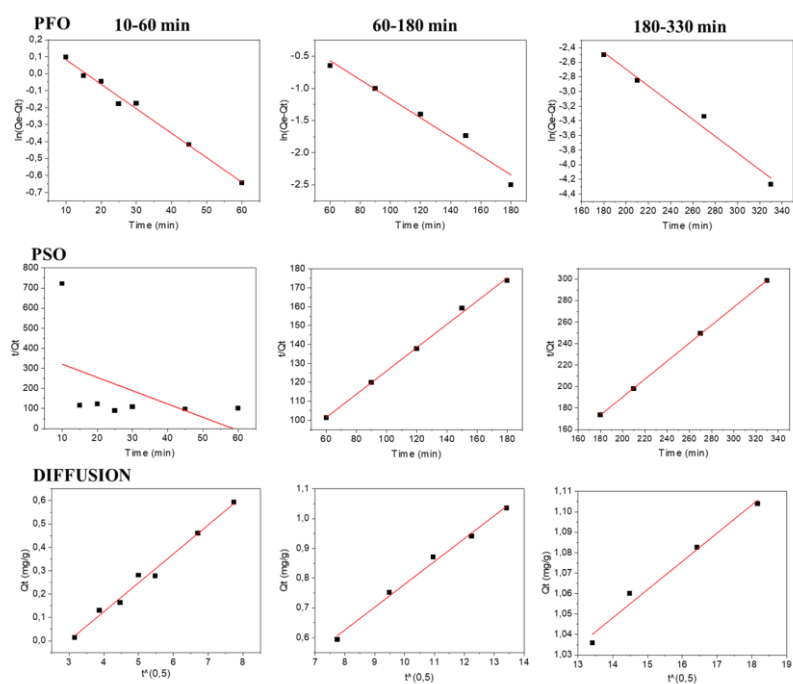

**Figure S7.** Linear fitting of PFO, PSO and diffusion kinetic models for nitrate adsorption at 1.55 mg/L initial concentration in three different time regions i.e. 10-60 minutes, 60-180 minutes and up to 330 minutes.

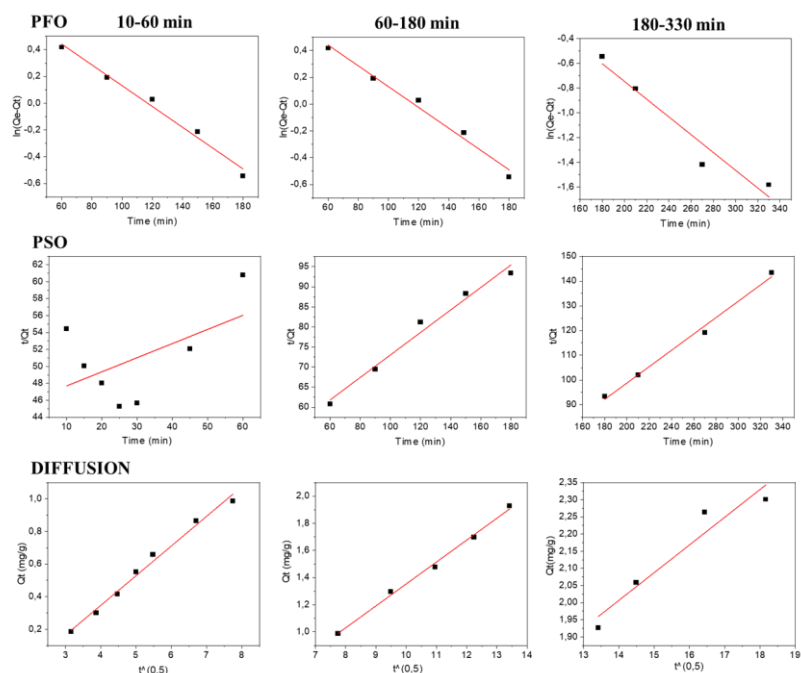

**Figure S8.** Linear fitting of PFO, PSO and diffusion kinetic models for nitrate adsorption at 3.10 mg/L initial concentration in three different time regions i.e. 10-60 minutes, 60-180 minutes and up to 330 minutes.

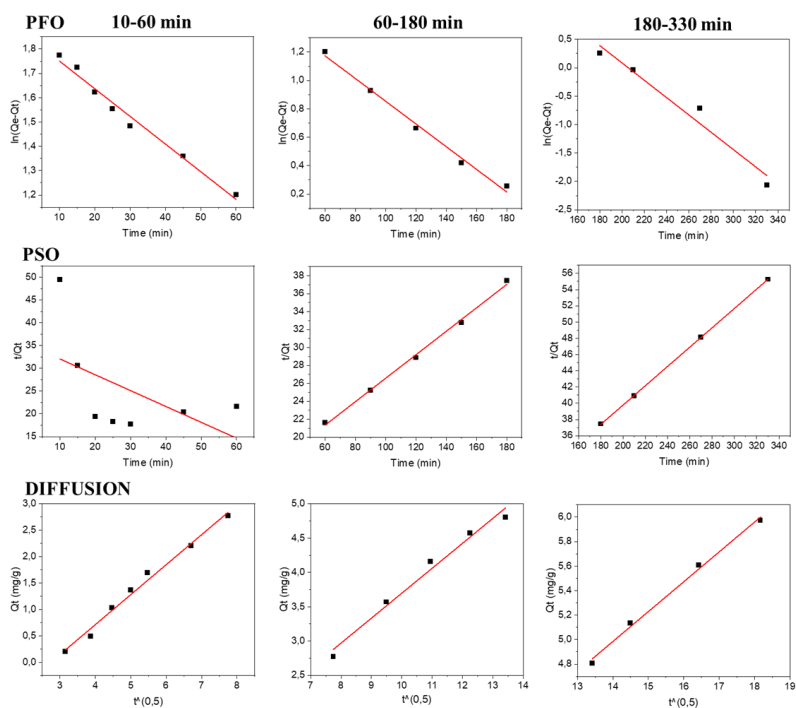

**Figure S9.** Linear fitting of PFO, PSO and diffusion kinetic models for nitrate adsorption at 7.75 mg/L initial concentration in three different time regions i.e. 10-60 minutes, 60-180 minutes and up to 330 minutes.

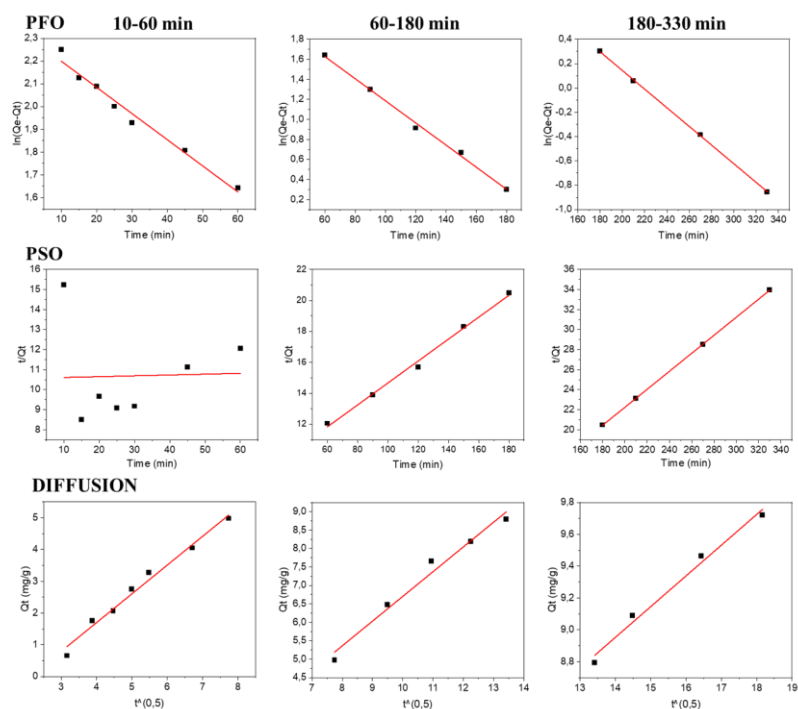

**Figure S10.** Linear fitting of PFO, PSO and diffusion kinetic models for nitrate adsorption at 15.50 mg/L initial concentration in three different time regions i.e. 10-60 minutes, 60-180 minutes and up to 330 minutes.

**Table S4.** Fitting parameters of Langmuir and Freundlich isotherm for nitrate adsorption on w-PTBr films.

| Langmuir          |              |       | Freundlich |                                            |       |
|-------------------|--------------|-------|------------|--------------------------------------------|-------|
| $Q_{\max}$ (mg/g) | $K_L$ (L/mg) | $R^2$ | $1/n$      | $K_F$ ( $L^{1/n} \text{ mg}^{(1-1/n)}/g$ ) | $R^2$ |
| -16.84            | 18.86        | 0.997 | 1.17       | 2.40                                       | 0.994 |

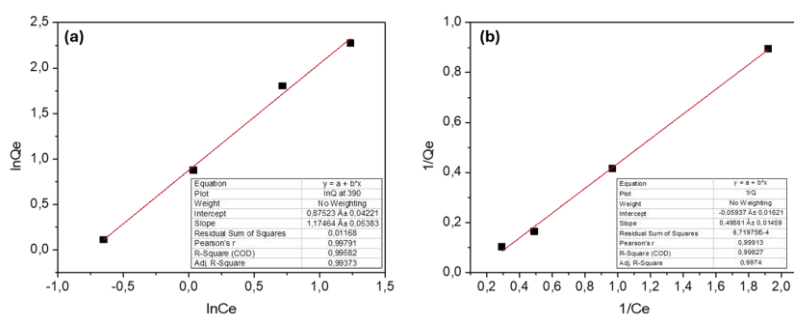

**Figure S11.** Freundlich (a) and Langmuir (b) plots for nitrate adsorption on w-PTBr films.



**Table S5.** Fitting parameters of all kinetic models for MO adsorption on w-PTBr film.

| MO concentration (mg/L) | Kinetic Models | Fitting Parameters |                  |                   |
|-------------------------|----------------|--------------------|------------------|-------------------|
|                         |                | R <sup>2</sup>     | SLOPE            | INTERCEPT         |
| 3.27                    | PFO            | 0.992              | -0.0035 ± 0.0001 | 0.8282 ± 0.0128   |
|                         | PSO            | 0.782              | 0.4980 ± 0.0749  | 64.7965 ± 10.4891 |
|                         | DIFF           | 0.977              | 0.0938 ± 0.0041  | -0.1447 ± 0.0408  |

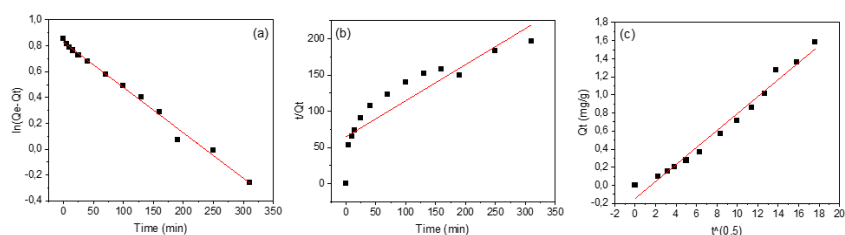

**Figure S12.** Linear fitting of kinetic models for MO adsorption at 3.27 mg/L initial concentrations up to 330 minutes: (a) PFO; (b) PSO and (c) diffusion.

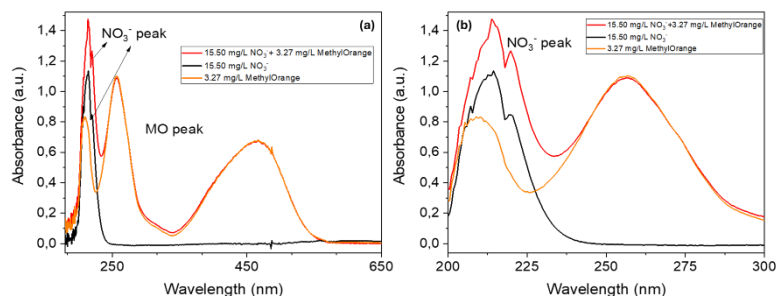

**Figure S13.** (a) UV-Visible absorbance spectra of 15.50 mg/L NO<sub>3</sub><sup>-</sup> solution (black curve), of 3.27 mg/L MO solution (orange curve) and of mixed solution at the same concentrations (black curve). (b) a magnification reporting the region between 200 and 300 nm of spectra where nitrate ions peak is clearly visible.

**Table S6.** Fitting parameters of all kinetic models for nitrate or MO adsorption on w-PTBr film in mixed solutions up to 330 minutes.

| Contaminants                       | Kinetic Model | Fitting Parameters |                  |                  |
|------------------------------------|---------------|--------------------|------------------|------------------|
|                                    |               | R <sup>2</sup>     | SLOPE            | INTERCEPT        |
| MO in mixed solution               | PFO           | 0.909              | -0.0014 ± 0.0001 | 0.7722 ± 0.0157  |
|                                    | PSO           | 0.958              | 1.0082 ± 0.0542  | 63.1430 ± 7.554  |
|                                    | DIFF          | 0.983              | 0.0511 ± 0.0017  | 0.0103 ± 0.0169  |
| KNO <sub>3</sub> in mixed solution | PFO           | 0.925              | -0.0048 ± 0.0003 | 2.1755 ± 0.0485  |
|                                    | PSO           | -0.037             | 0.0426 ± 0.0629  | 20.4611 ± 8.7604 |
|                                    | DIFF          | 0.950              | 0.5064 ± 0.0299  | -0.2821 ± 0.2954 |

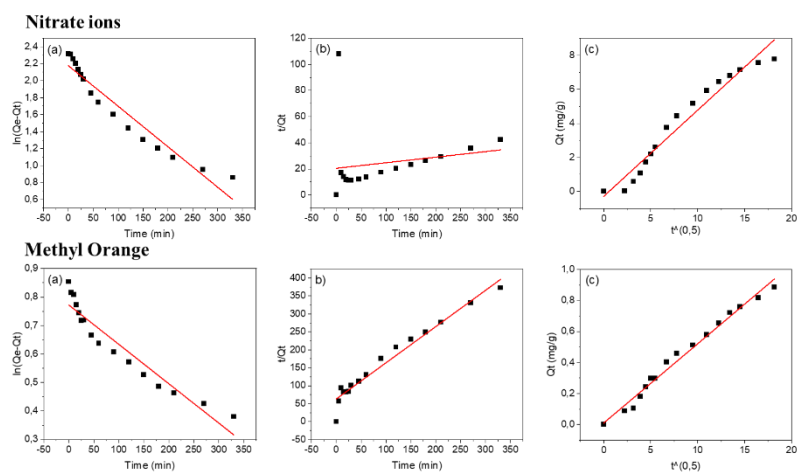

**Figure S14.** Linear fitting of kinetic models for nitrate and MO adsorption in mixed solutions up to 330 minutes: a) PFO; b) PSO and c) diffusion.

**Table S7.** Fitting parameters of PFO, PSO and diffusion kinetic models for nitrate at 15.50 mg/L and MO adsorption at 3.27 mg/L concentrations in three different regions i.e. 10-60 minutes, 60-180 minutes and up to 330 minutes.

| Solution                           | Kinetic Models | 10-60          |                        |                     | 60-180         |                     |                      | 180-330        |                     |                      |
|------------------------------------|----------------|----------------|------------------------|---------------------|----------------|---------------------|----------------------|----------------|---------------------|----------------------|
|                                    |                | R <sup>2</sup> | SLOPE                  | INTERCEPT           | R <sup>2</sup> | SLOPE               | INTERCEPT            | R <sup>2</sup> | SLOPE               | INTERCEPT            |
| MO in mixed solution               | PFO            | 0.933          | -0.0032<br>±<br>0.0004 | 0.8186<br>± 0.0119  | 0.993          | -0.0013<br>± 0.0001 | 0.7184 ±<br>0.0069   | 0.997          | -0.0007±<br>0.0001  | 0.6118 ±<br>0.0057   |
|                                    | PSO            | 0.768          | 0.9291<br>±<br>0.2035  | 70.6963 ±<br>6.826  | 0.959          | 0.9679 ±<br>0.0989  | 82.3249 ±<br>12.5878 | 0.994          | 0.8261 ±<br>0.0361  | 102.7447 ±<br>9.1794 |
|                                    | DIFF           | 0.972          | 0.0751<br>±<br>0.0052  | -0.1066 ±<br>0.0283 | 0.977          | 0.0570 ±<br>0.0036  | 0.0793 ±<br>0.0395   | 0.994          | 0.0339 ±<br>0.0015  | 0.2656 ±<br>0.0231   |
|                                    |                |                |                        |                     |                |                     |                      |                |                     |                      |
| KNO <sub>3</sub> in mixed solution | PFO            | 0.989          | -0.0104<br>±<br>0.0004 | 2.3466 ±<br>0.0151  | 0.992          | -0.0046<br>± 0.0002 | 2.0109 ±<br>0.0260   | 0.961          | -0.0023 ±<br>0.0003 | 1.5860 ±<br>0.0664   |
|                                    | PSO            | -0.072         | -0.0378<br>±<br>0.0489 | 14.1061 ±<br>1.6411 | 0.998          | 0.1052 ±<br>0.0030  | 7.5451 ±<br>0.3841   | 0.999          | 0.1069 ±<br>0.0016  | 7.0271 ±<br>0.4165   |
|                                    | DIFF           | 0.996          | 0.8640±<br>0.0232      | -2.1617 ±<br>0.1254 | 0.993          | 0.4315 ±<br>0.0181  | 1.1124 ±<br>0.1979   | 0.958          | 0.2011 ±<br>0.0241  | 4.1833 ±<br>0.3788   |

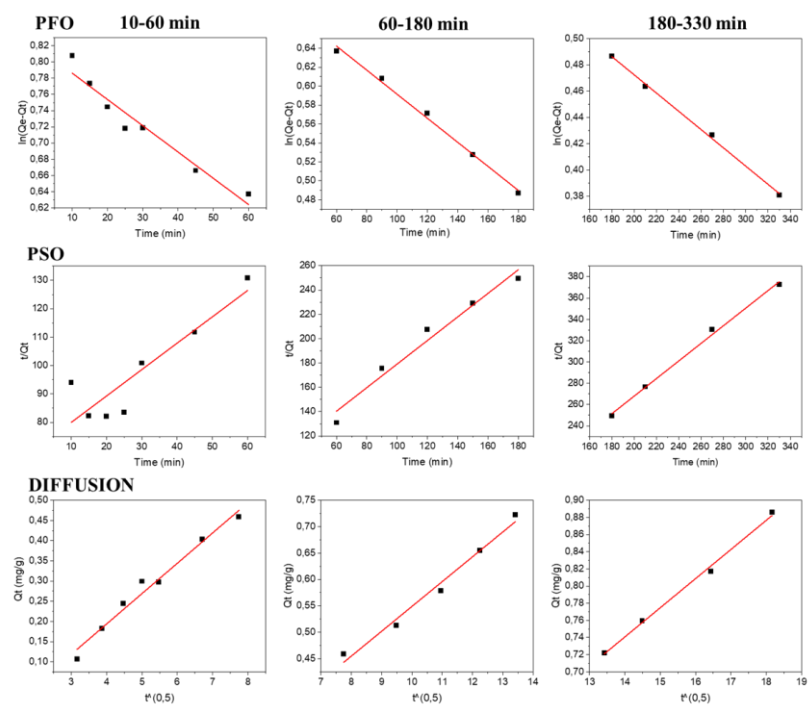

**Figure S15.** Linear fitting of PFO, PSO and diffusion kinetic models for MO adsorption at 3.27 mg/L initial concentration in mixed solutions considering three different time regions i.e. 10-60 minutes, 60-180 minutes and up to 330 minutes.

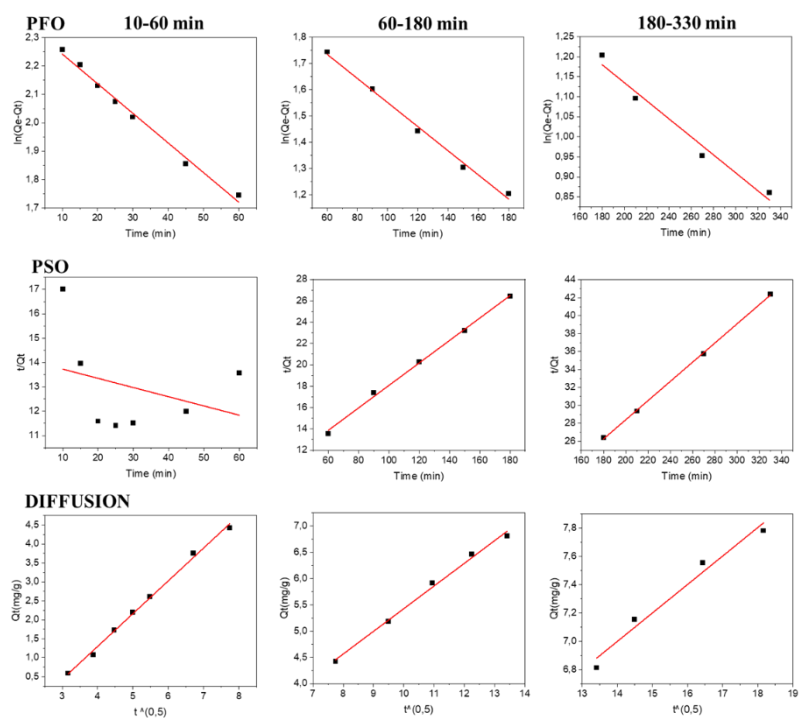

**Figure S16.** Linear fitting of PFO, PSO and diffusion kinetic models for nitrate adsorption at 15.50 mg/L initial concentration in mixed solutions considering three different time regions i.e. 10-60 minutes, 60-180 minutes and up to 330 minutes.
